# Supplementary material for: Project SoL—A Community-Based, Multi-Component Health Promotion Intervention to Improve Eating Habits and Physical Activity among Danish Families with Young Children. Part 1: Intervention Development and Implementation
Source: PubMed Central journal article supplement (PMC6025396; doi:10.3390/ijerph15061097), 2018-05-28
Supplement: ijerph-15-01097-s001.pdf [file ijerph-15-01097-s001.pdf]

**Appendix I.** Description of the SoL interventions from 2012 to 2014 (text in italic marks represent the overall themes).

| <b>2012</b>          |                                                          |                                                                                                                                              |                                                           |                                                                                                                                       |
|----------------------|----------------------------------------------------------|----------------------------------------------------------------------------------------------------------------------------------------------|-----------------------------------------------------------|---------------------------------------------------------------------------------------------------------------------------------------|
| <b>Year/month</b>    | <b>Name of activity</b>                                  | <b>Objectives</b>                                                                                                                            | <b>Settings</b>                                           | <b>Intervention components (principles and themes)</b>                                                                                |
| January–<br>March    | Kick-off partnership meeting                             | Strengthen partnership and define common goals and plans                                                                                     | Nature museum<br>Bornholm                                 | Public meeting and workshop (participation, integration, and <i>visibility</i> )                                                      |
| April–June           | Visit and international symposium on 'food architecture' | Exchange knowledge with international researchers, Brian Wansink and Adam Brumberg from Cornell University. And inspiration for supermarkets | Copenhagen, Bornholm, supermarkets on Bornholm            | Public meeting and workshop (participation, integration, empowerment, and <i>visibility</i> )                                         |
|                      | Folk meeting (political festival)                        | Create awareness and debate about health in local community                                                                                  | Allinge Folkemødet on Bornholm                            | Taste activities, quiz and debate with professionals ( <i>visibility</i> )                                                            |
|                      | Supermarket workshop                                     | Empower supermarket employees in healthy choices                                                                                             | Supermarkets                                              | Workshops (participation and integration)                                                                                             |
| July–<br>September   | Three future scenario workshops                          | Empower children in health perspectives                                                                                                      | Grade 2, Nexø school, Pedagogues and teachers at Bornholm | Future scenario workshop (participation and empowerment)                                                                              |
|                      | Kick-off party with the local community                  | Create awareness about Project SoL; Gather and involve the project partners, families and professionals of SoL-Bornholm                      | The local community, Almindingen, Bornholm,               | Party with taste activities, play, games, sports, health theatre (participation, <i>visibility, taste and senses, active play</i> )   |
|                      | Children's drawings                                      | Create awareness on healthy diet and create activities across settings (between childcare center institutions and supermarkets)              | Supermarkets, childcare centers, Bornholm                 | Children create drawings and hang them in the local supermarkets of Bornholm (integration, <i>visibility, fruit and vegetables</i> )  |
| October–<br>December | Partnership meeting                                      | Status on the project and input from the partnership                                                                                         | Conference centre, Nexø                                   | Partnership meeting (participation)                                                                                                   |
|                      | Child festival in Hasle                                  | Increase awareness and skills to make healthy lunches                                                                                        | Hasle sports arena, childcare centres and school          | Make your own lunch, Make a creative Sun carpet (Empowerment, <i>visibility, whole grain, fruit and vegetables</i> )                  |
|                      | Nature as pantry                                         | Use the nature to empower children within healthy living                                                                                     | childcare centres                                         | Forrest trips with professionals including nature guides and an actor (empowerment, <i>nature and movement</i> )                      |
|                      | Treasure hunt                                            | Increase awareness and make it fun to eat healthy                                                                                            | Supermarkets, families                                    | Treasure hunts in supermarkets to find healthy ingredients for making a soup (integration, empowerment, <i>fruit and vegetables</i> ) |
|                      | Lunch box seminar                                        | Increase awareness and skills to make healthy lunches                                                                                        | Supermarkets, childcare centres                           | Make your own lunch in supermarkets (integration, empowerment, fruit and vegetables, and whole grains)                                |
|                      | Christmas calendar                                       | Inspire families to make healthy meals, snacks, and drinks during December                                                                   | Supermarkets, Facebook                                    | Healthy recipes based on local input shared in supermarkets and on Facebook ( <i>visibility, healthy alternatives</i> )               |
| <b>2013</b>          |                                                          |                                                                                                                                              |                                                           |                                                                                                                                       |
| <b>Year/month</b>    | <b>Name of activity</b>                                  | <b>Objectives</b>                                                                                                                            | <b>Settings</b>                                           | <b>Intervention components (principles and themes)</b>                                                                                |
| January–<br>March    |                                                          |                                                                                                                                              |                                                           |                                                                                                                                       |
|                      | Meeting with school administration                       | Involve the schools and plan interventions and activities within the schools                                                                 | Schools                                                   | Meeting (participation, integration)                                                                                                  |
|                      | Meetings with TV2 Bornholm (2)                           | Involve the media partners and plan the media intervention                                                                                   | Mass media                                                | Meeting (participation, integration)                                                                                                  |
|                      | Meeting with parents at                                  | Involve the families in SoL activities                                                                                                       | School                                                    | Meeting (participation)                                                                                                               |

**Appendix I.** Description of the SoL interventions from 2012 to 2014 (text in italic marks represent the overall themes).

|                |                                                                                               |                                                                                                                                       |                                                            |                                                                                                                                                                      |
|----------------|-----------------------------------------------------------------------------------------------|---------------------------------------------------------------------------------------------------------------------------------------|------------------------------------------------------------|----------------------------------------------------------------------------------------------------------------------------------------------------------------------|
|                | Nexø school                                                                                   |                                                                                                                                       |                                                            |                                                                                                                                                                      |
|                | Meeting with The Regional Municipality of Bornholm                                            | Involve the municipalities                                                                                                            | Local community                                            | Meeting (participation)                                                                                                                                              |
|                | Meeting with COOP                                                                             | Involve the supermarkets and plan the supermarket intervention                                                                        | Supermarkets                                               | Meeting (participation, integration)                                                                                                                                 |
|                | Seminar “Sundhedsfremme and local sammenhængskraft”                                           | Share and discuss the ideas of SoL with national researchers                                                                          | AAU, Copenhagen                                            | Seminar for professionals ‘health promotion and local community cohesion’ (knowledge)                                                                                |
|                | SoL-week – Healthy living, Nexø school                                                        | Increasing awareness on healthy diet and PA                                                                                           | School, Supermarket, Mass media                            | Workshops & taste education in school<br>Tastings in supermarket, nature fitness (Participation, integration, <i>taste and senses, nature and movement</i> )         |
|                | Lunch box circus                                                                              | Increasing awareness on healthy diet and PA among families                                                                            | Bornholms Højskole                                         | Make your own “Healthy lunch box” day with play and presentations (knowledge, empowerment, <i>active play, fruit and vegetables, whole grains</i> )                  |
| April–June     | Local group meetings                                                                          | Involve the local communities in planning and execution of health promoting activities                                                | Local community                                            | Meetings (participation, integration)                                                                                                                                |
|                | “Fish from a child perspective workshop”                                                      | Increasing awareness on healthy diet (fish), planning TV programmes                                                                   | Families, local community, Mass media                      | Healthy tips and fish recipes on Facebook, Cooking workshop with children and families from Bornholm (Empowerment, <i>Fish, visibility</i> )                         |
|                | Healthy alternatives with Fish                                                                | Increasing awareness on eating fish. Motivate locals to share their knowledge about the local fish culture                            | Childcare centres, Families, Local community               | Healthy tips and fish recipes on Facebook, visiting fish smoke house, Cooking fish in childcare centres and with families (BBQ) in childcare centres ( <i>Fish</i> ) |
|                | Healthy alternatives, Fish, Trolling                                                          | Increasing awareness on eating fish. Motivate locals to share their knowledge about the local fish culture                            | Childcare centres, Families, Local community               | Healthy tips and fish recipes on Facebook, Cooking fish (BBQ) and orienteering at the harbour (Empowerment, <i>fish, visibility</i> )                                |
|                | Healthy alternatives, Healthy snack                                                           | Increasing awareness on eating healthy snacks.                                                                                        | Childcare centres, Families, Supermarkets, Local community | Healthy snacks served in childcare centres and supermarkets (empowerment, integration, <i>Healthy alternatives</i> )                                                 |
| July–September | Healthy meal concepts                                                                         | Promote healthy meal choices                                                                                                          | Supermarket                                                | Co-collation of food items for a healthy meal (integration, <i>Fish, Fruit and vegetables</i> )                                                                      |
|                | Candy-free checkouts                                                                          | Collaboration with the supermarket staff to create healthy shops. Decrease the sale of candy and increase the sale of healthy snacks. | Supermarkets                                               | One candy-free checkout in four of the intervention supermarkets (participation, <i>healthy alternatives</i> )                                                       |
| July–September | Focus on whole grains in the supermarkets (Harvest theme and inspiration for a healthy lunch) | Increasing awareness and motivation for eating whole-grain                                                                            | Supermarkets, Mass media                                   | Promotion of whole grains in supermarkets ( <i>whole grains</i> )                                                                                                    |
|                | Harvest, Awareness week                                                                       | Increasing awareness of SoL as well as awareness and motivation for healthy diet and PA                                               | Childcare centres, schools, Mass media                     | Taste activities in school and childcare centres ( <i>whole grains, fruit and vegetables, visibility</i> )                                                           |
|                | Harvest, “Carpenter festival”                                                                 | Increasing awareness and motivation for healthy diet                                                                                  | Local community, school in Nexø                            | Cooking event with healthy foods arranged by the local action group in Nexø (integration, empowerment, <i>fruit and vegetables, whole grains</i> )                   |
|                | Nature fitness                                                                                | Increasing awareness and motivation for PA                                                                                            | Childcare centres, Mass media                              | Activities with children and adults using the green areas around the childcare centres (empowerment, <i>Nature and movements</i> )                                   |

**Appendix I.** Description of the SoL interventions from 2012 to 2014 (text in italic marks represent the overall themes).

|                   |                                                    |                                                                                        |                                                    |                                                                                                                                                                                                                                                                                                                                   |
|-------------------|----------------------------------------------------|----------------------------------------------------------------------------------------|----------------------------------------------------|-----------------------------------------------------------------------------------------------------------------------------------------------------------------------------------------------------------------------------------------------------------------------------------------------------------------------------------|
|                   | Lunch bag activities                               | Inspiration and learning about how to make a healthy lunch box                         | Supermarkets, mass media, childcare centres        | Children making their own healthy lunch bag in the supermarket. (empowerment, integration, <i>whole grains, fruit and vegetables</i> )                                                                                                                                                                                            |
| October–December  | Nature fitness                                     | Increasing awareness and motivation for PA                                             | Childcare centres, Mass media                      | Activities with the children combined with a course on nature fitness for professionals (Empowerment, integration, <i>nature and movements</i> )                                                                                                                                                                                  |
|                   | Harvest, Healthy, theme day Allinge                | Increasing awareness and motivation for healthy diet                                   | School                                             | Workshop in school, orienteering with taste challenge (Empowerment, <i>taste and senses, whole grains</i> )                                                                                                                                                                                                                       |
|                   | Harvest, Energy for life theme week with breakfast | Increasing awareness on healthy diet and PA                                            | Schools, local community, mass media               | Theme week in Hasle school (empowerment, <i>fruit and vegetables</i> )                                                                                                                                                                                                                                                            |
|                   | Harvest, Halloween party                           | Increasing awareness on healthy diet and PA                                            | Childcare centres, local community, mass media     | Halloween cooking event (soup) arranged by the local action group in Nexø (integration, <i>fruit and vegetables</i> )                                                                                                                                                                                                             |
|                   | Child festival in Hasle                            | Increasing awareness on healthy diet and PA                                            | Local community                                    | Lunch workshop “make your own lunch” (integration, <i>whole grains, fruit and vegetables</i> )                                                                                                                                                                                                                                    |
|                   | Lunch box seminars                                 | Increasing awareness and skills to make healthy lunch                                  | Childcare centres, supermarkets                    | Children making their own healthy lunch bag in the supermarket (empowerment, integration, <i>whole grains, fruit and vegetables</i> )                                                                                                                                                                                             |
|                   | Sensory, taste. and cooking workshops              | Increasing awareness on healthy diet                                                   | Childcare centres, schools                         | Taste and sensory education, cooking workshops in school and childcare centres (empowerment, <i>taste and senses</i> )                                                                                                                                                                                                            |
|                   | Christmas calendar                                 | Inspire families to make healthy meals, snacks and drinks during December              | Supermarkets, Facebook                             | Healthy recipes based on local input shared on TV2s homepage and on Facebook ( <i>visibility, healthy alternatives</i> )                                                                                                                                                                                                          |
|                   | Christmas theme in Hasle school                    | Increasing awareness and motivation for healthy diet and PA                            | Schools                                            | Breakfast club, active week (empowerment, <i>whole grains, active play</i> )                                                                                                                                                                                                                                                      |
| <b>2014</b>       |                                                    |                                                                                        |                                                    |                                                                                                                                                                                                                                                                                                                                   |
| <b>Year/month</b> | <b>Name of activity</b>                            | <b>Objectives</b>                                                                      | <b>Settings</b>                                    | <b>Intervention components (principles and themes)</b>                                                                                                                                                                                                                                                                            |
| January–March     | Kvickly’s yearly meeting                           | Inform the local community about SoL                                                   | Local community                                    | Meeting in COOP and presentation of SoL (integration, <i>visibility</i> )                                                                                                                                                                                                                                                         |
|                   | Partnership meeting                                | Status on the project and input from partnership                                       | Almindingen, Bornholm                              | Meeting with local partners (integration)                                                                                                                                                                                                                                                                                         |
|                   | Competition among supermarkets                     | Increasing sales of healthy foods in supermarkets. Engagement of supermarket employees | Supermarket, mass media                            | Competition on sales of fish, root fruits and wholegrain breakfast cereal (participation, <i>fish, whole grains, fruit and vegetables</i> )                                                                                                                                                                                       |
|                   | SoL by night                                       | Increasing awareness on healthy choices in supermarkets                                | Supermarket, mass media, childcare centres, school | Events in the supermarkets, including activities for families about healthy lifestyle, tastings of local food products, and a soup made by children from the local childcare centre, workshop for children with inspiration for healthy lunch bags (participation, empowerment, <i>fruit and vegetables, whole grains, fish</i> ) |
|                   | Sensory, taste. and                                | Increasing awareness on healthy diet                                                   | Schools and childcare                              | Taste and sensory education, cooking workshops in                                                                                                                                                                                                                                                                                 |

**Appendix I.** Description of the SoL interventions from 2012 to 2014 (text in italic marks represent the overall themes).

|            |                                   |                                                                                        |                                    |                                                                                                                                           |
|------------|-----------------------------------|----------------------------------------------------------------------------------------|------------------------------------|-------------------------------------------------------------------------------------------------------------------------------------------|
|            | workshops                         |                                                                                        | centres                            | schools and childcare centres (empowerment, <i>taste and senses, fruit and vegetables</i> )                                               |
|            | Theme day healthy foods in Hasle  | Increasing awareness and motivation for healthy diet                                   | School                             | Workshop in school , cooking healthy meals (empowerment, <i>fruit and vegetables, whole grains</i> )                                      |
|            | Theme on healthy breakfast        | Increasing awareness and motivation for healthy diet                                   | School, supermarket, mass media    |                                                                                                                                           |
|            | Orienteering in the Dark, Allinge | Increasing awareness and motivation for healthy diet and PA                            | School, Local community            | Orienteering race with taste samples and quiz arranged by the local group of Allinge (integration, <i>taste and senses, active play</i> ) |
|            | Folk meeting (political festival) | Create awareness and debate about health in local community                            | Allinge Folkemødet on Bornholm     | Taste activities, quiz and debate with professionals ( <i>Visibility</i> )                                                                |
|            | Lunch box workshop                | Increasing awareness and skills to make healthy lunch                                  | School, Bornholm                   | Lunch workshop “make your own lunch” (empowerment, <i>whole grains, fruit and vegetables</i> )                                            |
|            | Nexø city court (byting)          | Local anchorage of intervention within the city court                                  | Local community                    | Start-up of Nexø city court (Integration)                                                                                                 |
|            | SoL finishing parties (3)         | Increase awareness of SoL and celebrate with the local community                       | Local community<br>SoL partnership | Party in each of the three local communities ( <i>visibility, fruit and vegetables, active play</i> )                                     |
| April–June | Local group meetings              | Involve the local communities in planning and execution of health promoting activities | Local community                    | Local group, Hasle (integration)                                                                                                          |
|            | Local group meetings, (2)         | Strengthen the local anchorage of SoL                                                  | Local community                    | Local group, Hasle and Nexø (integration)                                                                                                 |
|            | BRK                               | Strengthen the local anchorage of SoL                                                  | Local community                    | Local group, Hasle and Nexø (integration)                                                                                                 |
|            |                                   |                                                                                        |                                    |                                                                                                                                           |

An official outdoor party with physical activity games, health theatre, and a vegetable soup kitchen was held on the 7 September 2012 to kick-start the intervention and to gather the approx. 400–600 children from childcare centres, schools, and afterschool care, as well as their teachers, pedagogies, supermarket employees, local sports clubs, parents, and grandparents. The intervention components were designed to create synergy between the super-settings of the intervention (e.g., childcare, schools, afterschool care, supermarkets, and the local mass media), to promote healthy eating (e.g., vegetables, fruit, fish, and whole grains) and physical activity. Theme days and workshops focusing on health from a child perspective, taste education, healthy meals (e.g., breakfast, lunch, and social dinners), and physical activity (e.g., nature fitness) were arranged in childcare centres and schools, and combined with additional events in the supermarket (e.g., tastings, ‘build your own lunch box’, soup treasure-hunts) and in the local community (e.g., lunch pack circus, night-orienteering race with taste samples). Final parties with all participants were held in each of the three local communities in April 2014 to hand the project over to the locals.
